# Supplementary material
Source: Elsevier journal article supplement (https://www.sciencedirect.com/science/article/pii/S0001731021004294)
Supplement: mmc1 [file S0001731021004294:mmc1.pdf]

**TABLA II.- RESPUESTAS DE LOS TUTORES A LA ENCUESTA**

**1. ¿Cuánto tiempo hace que eres dermatólogo?**

| OPCIONES DE RESPUESTA | RESPUESTAS |    |
|-----------------------|------------|----|
| < 1 año               | 0,00%      | 0  |
| 1-2 años              | 0,00%      | 0  |
| 2-4 años              | 6,25%      | 4  |
| 5 ó más               | 93,75%     | 60 |
| TOTAL                 |            | 64 |

**2. ¿Cuánto tiempo hace que eres tutor?**

| OPCIONES DE RESPUESTA | RESPUESTAS |    |
|-----------------------|------------|----|
| < 1 año               | 7,81%      | 5  |
| 1-2 años              | 18,75%     | 12 |
| 2-4 años              | 32,81%     | 21 |
| 5 ó más               | 40,63%     | 26 |
| TOTAL                 |            | 64 |

**3. ¿Cuáles son las razones por las que eres tutor?**

| OPCIONES DE RESPUESTA   | RESPUESTAS |    |
|-------------------------|------------|----|
| decisión propia         | 64,06%     | 41 |
| a petición del jefe     | 26,56%     | 17 |
| por imposición del jefe | 1,56%      | 1  |
| porque nadie quiere ser | 3,13%      | 2  |
| otras                   | 4,69%      | 3  |
| TOTAL                   |            | 64 |

**4. ¿Tienes tiempo de liberación docente?**

| OPCIONES DE RESPUESTA | RESPUESTAS |    |
|-----------------------|------------|----|
| Si                    | 43,75%     | 28 |
| No                    | 56,25%     | 36 |
| TOTAL                 |            | 64 |

5. ¿Se respeta?

| OPCIONES DE RESPUESTA | RESPUESTAS |    |
|-----------------------|------------|----|
| Si                    | 77,78%     | 21 |
| No                    | 22,22%     | 6  |
| TOTAL                 |            | 27 |

6. ¿Realizas entrevistas tutor/residente?

| OPCIONES DE RESPUESTA | RESPUESTAS |    |
|-----------------------|------------|----|
| Si                    | 90,32%     | 56 |
| No                    | 9,68%      | 6  |
| TOTAL                 |            | 62 |

7. ¿Qué instrumentos de evaluación empleas?

| OPCIONES DE RESPUESTA       | RESPUESTAS |    |
|-----------------------------|------------|----|
| entrevistas tutor-residente | 48,21%     | 27 |
| memoria anual               | 21,43%     | 12 |
| libro del residente         | 16,07%     | 9  |
| otros                       | 14,29%     | 8  |
| TOTAL                       |            | 56 |

8. ¿Crees qué es útil un libro del residente?

| OPCIONES DE RESPUESTA | RESPUESTAS |    |
|-----------------------|------------|----|
| Si                    | 83,61%     | 51 |
| No                    | 16,39%     | 10 |
| TOTAL                 |            | 61 |

9. ¿Asistes a cursos o congresos de docencia?

| OPCIONES DE RESPUESTA | RESPUESTAS |    |
|-----------------------|------------|----|
| Si                    | 52,46%     | 32 |
| No                    | 47,54%     | 29 |
| TOTAL                 |            | 61 |

10. ¿Tienes dificultades para asistir?

| OPCIONES DE RESPUESTA | RESPUESTAS |    |
|-----------------------|------------|----|
| Si                    | 51,61%     | 16 |
| No                    | 48,39%     | 15 |
| TOTAL                 |            | 31 |

11. ¿Crees qué sería necesario para tu desempeño como tutor?

| OPCIONES DE RESPUESTA | RESPUESTAS |    |
|-----------------------|------------|----|
| Si                    | 86,89%     | 53 |
| No                    | 13,11%     | 8  |
| TOTAL                 |            | 61 |

12. ¿Tienes asignados días para estos cursos?

| OPCIONES DE RESPUESTA | RESPUESTAS |    |
|-----------------------|------------|----|
| Si                    | 21,31%     | 13 |
| No                    | 78,69%     | 48 |
| TOTAL                 |            | 61 |

13. ¿Crees qué sería útil que la AEDV organizase cursos de formación en docencia?

| OPCIONES DE RESPUESTA | RESPUESTAS |    |
|-----------------------|------------|----|
| Si                    | 95,08%     | 58 |
| No                    | 4,92%      | 3  |
| TOTAL                 |            | 61 |

14. ¿Tu jefe cuenta contigo para asignar actividad docente a los residentes?

| OPCIONES DE RESPUESTA | RESPUESTAS |    |
|-----------------------|------------|----|
| Si                    | 85,25%     | 52 |
| No                    | 14,75%     | 9  |
| TOTAL                 |            | 61 |

15. ¿Tu servicio conoce tus funciones como tutor?

| OPCIONES DE RESPUESTA | RESPUESTAS |    |
|-----------------------|------------|----|
| Si                    | 75,41%     | 46 |
| No                    | 24,59%     | 15 |
| TOTAL                 |            | 61 |

16. ¿Informas al resto de los miembros del servicio de la evolución de la formación de los residentes?

| OPCIONES DE RESPUESTA | RESPUESTAS |    |
|-----------------------|------------|----|
| Sí                    | 59,02%     | 36 |
| No                    | 40,98%     | 25 |
| TOTAL                 |            | 61 |

17. ¿Te sientes valorado por el servicio?

| OPCIONES DE RESPUESTA | RESPUESTAS |    |
|-----------------------|------------|----|
| Sí                    | 78,69%     | 48 |
| No                    | 21,31%     | 13 |
| TOTAL                 |            | 61 |

18. ¿Te sientes valorado por los residentes?

| OPCIONES DE RESPUESTA | RESPUESTAS |    |
|-----------------------|------------|----|
| Sí                    | 88,52%     | 54 |
| No                    | 11,48%     | 7  |
| TOTAL                 |            | 61 |

19. ¿Te gustaría seguir siendo tutor?

| OPCIONES DE RESPUESTA | RESPUESTAS |    |
|-----------------------|------------|----|
| Sí                    | 88,52%     | 54 |
| No                    | 11,48%     | 7  |
| TOTAL                 |            | 61 |

20. ¿Cuáles son tus necesidades como tutor?

| OPCIONES DE RESPUESTA  | RESPUESTAS |    |
|------------------------|------------|----|
| Ninguna                | 1,64%      | 1  |
| Tiempo                 | 80,33%     | 49 |
| Reconocimiento         | 6,56%      | 4  |
| Remuneración económica | 11,48%     | 7  |
| TOTAL                  |            | 61 |
